# Supplementary material for: Multifunctional mixed ligand metal organic frameworks: X-ray structure, adsorption, luminescence and electrical conductivity with theoretical correlation
Source: Royal Society of Chemistry journal article supplement (doi:10.1039/c6ce01173j), 2016-01-01
Supplement: c6ce01173j1.pdf [file c6ce01173j1.pdf]

## Electronic supplementary information

### **Multifunctional mixed ligand metal organic frameworks: X-ray structure, adsorption, luminescence and electrical conductivity with theoretical correlation**

Biswajit Bhattacharya, Dilip Kumar Maity, Animesh Layek, Sk Jahiruddin, Arijit Halder, Arka Dey, Saheli Ghosh, Chandra Chowdhury, Ayan Datta, Partha Pratim Ray, and Debajyoti Ghoshal

#### Tables related to X-ray structure:

**Table S1** Selected bond Lengths (Å) and bond angles (°) for **1**.

|                                      |           |                         |           |
|--------------------------------------|-----------|-------------------------|-----------|
| Zn1 -O1                              | 2.564(2)  | Zn1-O1W                 | 2.056(2)  |
| Zn1 -O2                              | 2.013(2)  | Zn1-N1                  | 2.202(2)  |
| Zn1-O4 <sup>a</sup>                  | 1.994(2)  | Zn1-N4 <sup>b</sup>     | 2.215(2)  |
| O1-Zn1-O1W                           | 88.16(7)  | O1-Zn1-O2               | 55.76(7)  |
| O1-Zn1-N1                            | 88.57(7)  | O1-Zn1-N4 <sup>b</sup>  | 92.40(9)  |
| O1-Zn1-O4 <sup>a</sup>               | 165.40(7) | O1W-Zn1-O2              | 143.67(8) |
| O1W-Zn1-N1                           | 90.31(7)  | O1W-Zn1-N4 <sup>b</sup> | 87.91(7)  |
| O1W-Zn1-O4 <sup>a</sup>              | 106.42(8) | O2-Zn1-N1               | 92.61(8)  |
| O2-Zn1-N4 <sup>b</sup>               | 89.44(9)  | O2-Zn1-O4 <sup>a</sup>  | 109.76(8) |
| N1-Zn1-N4 <sup>b</sup>               | 177.94(9) | O4 <sup>a</sup> -Zn1-N1 | 90.40(7)  |
| O4 <sup>a</sup> -Zn1-N4 <sup>b</sup> | 89.12(9)  |                         |           |

Symmetry code:  $a = 1+x, y, z$ ;  $b = x, y, -1+z$ .

**Table S2**  $\pi$ - $\pi$  interactions in **1**, **2** and C-H...  $\pi$  interaction in **1**.

|          | Ring(i) → Ring(j)          | Distance of centroid(i) from ring(j), (Å) | Dihedral angle (i,j) (deg) | Distance between the (i,j) ring centroids, (Å) |
|----------|----------------------------|-------------------------------------------|----------------------------|------------------------------------------------|
| <b>1</b> | R(1) → R(5) <sup>i</sup>   | 3.889(3)                                  | 0.8(2)                     | 3.542(2)                                       |
|          | R(2) → R(4) <sup>ii</sup>  | 3.873(3)                                  | 2.2(2)                     | 3.5408(19)                                     |
|          | R(3) → R(3) <sup>iii</sup> | 3.874(2)                                  | 0                          | 3.5626(9)                                      |
|          | R(4) → R(2) <sup>ii</sup>  | 3.873(3)                                  | 2.2(2)                     | 3.5744(19)                                     |
|          | R(4) → R(4) <sup>iv</sup>  | 3.639(3)                                  | 0                          | 3.5238(19)                                     |
|          | R(5) → R(1) <sup>i</sup>   | 3.889(3)                                  | 0.8(2)                     | 3.5481(12)                                     |
| <b>2</b> | R(1) → R(6) <sup>v</sup>   | 3.8375(19)                                | 14.14(16)                  | 3.5213(14)                                     |
|          | R(6) → R(1) <sup>v</sup>   | 3.8374(19)                                | 14.14(16)                  | 3.5408(11)                                     |

|          | C-H→ ring(j)                      | H...R distance (Å) | C-H...R angle (deg) | C...R distance (Å) |
|----------|-----------------------------------|--------------------|---------------------|--------------------|
| <b>1</b> | C(15)-H(15) → R(1) <sup>iii</sup> | 2.80               | 162                 | 3.700(3)           |

Symmetry code: i = 1-x, -y, 2-z; ii = x, y, z; iii = -x, 1-y, 1-z; iv = -x, 1-y, 2-z; v = 1-x, 1-y, 1-z.

R(i)/R(j) denotes the ith/jth rings: R(1) = N(1)/C(1)/C(2)/C(3)/C(4)/C(5); R(2) = N(4)/C(6)/C(7)/C(8)/C(9)/C(10); R(3) = C(12)/C(13)/C(14)/C(15)/C(16)/C(18); R(4) = N(5)/C(19)/C(20)/C(21)/C(22)/C(23); R(5) = N(8)/C(24)/C(25)/C(26)/C(27)/C(28); R(6) = C(7)/C(8)/C(9)/C(10)/C(11)/C(13).

**Table S3** Hydrogen bonding interactions (Å, °) of **1** and **2**.

|          | D-H...A                     | D-H    | H...A  | D...A    | <D-H...A |
|----------|-----------------------------|--------|--------|----------|----------|
| <b>1</b> | O1W-H1WA...O1 <sup>i</sup>  | 0.8500 | 2.0100 | 2.769(3) | 148.00   |
|          | O5-H5...N8 <sup>ii</sup>    | 0.8200 | 1.9300 | 2.732(5) | 165.00   |
| <b>2</b> | O5-H5A...O1W <sup>iii</sup> | 0.8200 | 1.9600 | 2.746(6) | 162.00   |
|          | O1W-H2WB...O2               | 0.8500 | 1.9200 | 2.649(5) | 144.00   |

Symmetry code: i = 1-x, -y, 1-z; ii = x, 1+y, -1+z; iii = 1-x, 2-y, 2-z.

**Table S4** Selected Bond Lengths (Å) and Bond Angles (°) for **2**.

|                         |            |                                      |            |
|-------------------------|------------|--------------------------------------|------------|
| Zn1-O1                  | 1.9460(18) | Zn1-O1S                              | 2.079(3)   |
| Zn1-N1                  | 2.035(2)   | Zn1-O4 <sup>a</sup>                  | 1.9522(18) |
| Zn1-O4 <sup>b</sup>     | 2.5723(19) |                                      |            |
| O1-Zn1-O1S              | 97.87(9)   | O1-Zn1-N1                            | 102.39(9)  |
| O1-Zn1-O4 <sup>a</sup>  | 125.35(8)  | O1-Zn1-O4 <sup>b</sup>               | 84.23(7)   |
| O1S-Zn1-N1              | 92.54(10)  | O1S-Zn1-O4 <sup>a</sup>              | 100.81(9)  |
| O1S-Zn1-O4 <sup>b</sup> | 176.64(8)  | O4 <sup>a</sup> -Zn1-N1              | 127.27(9)  |
| O4 <sup>b</sup> -Zn1-N1 | 84.44(9)   | O4 <sup>a</sup> -Zn1-O4 <sup>b</sup> | 79.96(7)   |

Symmetry Code: a = 1+x, 1+y, z; b = -x, 1-y, 1-z.

**Figures related to single crystal X-ray structure and the characterization of 1 and 2:**

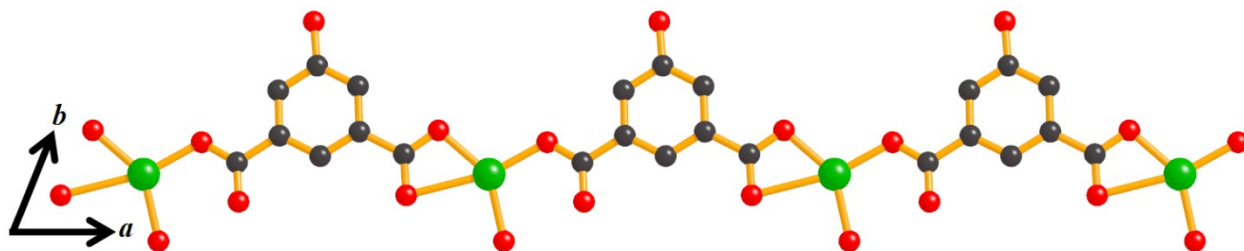

**Fig. S1** View of  $[\text{Zn}(\text{HO-1,3-bdc})]_n$  one-dimensional (1D) chains in **1** (azbpy has been omitted for clarity).

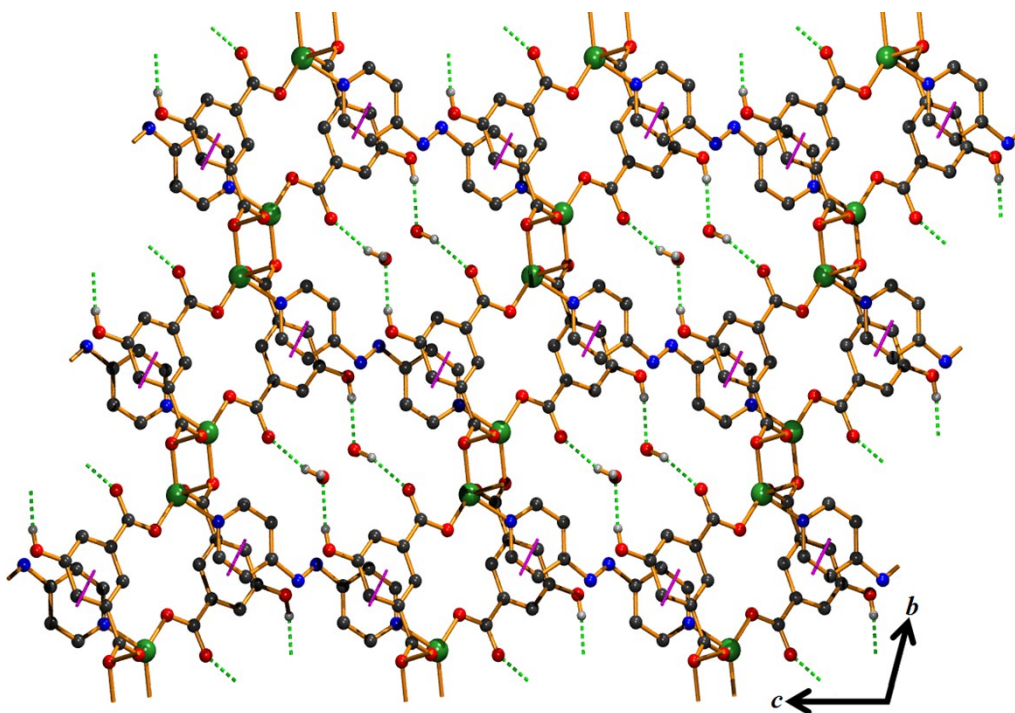

**Fig. S2** Supramolecular 3D arrangement in **2** by locking the 2D sheets by H-bonding and  $\pi$ - $\pi$  interaction ( $\pi$ - $\pi$  interaction: pink dotted lines & H-bonding: green dotted lines).

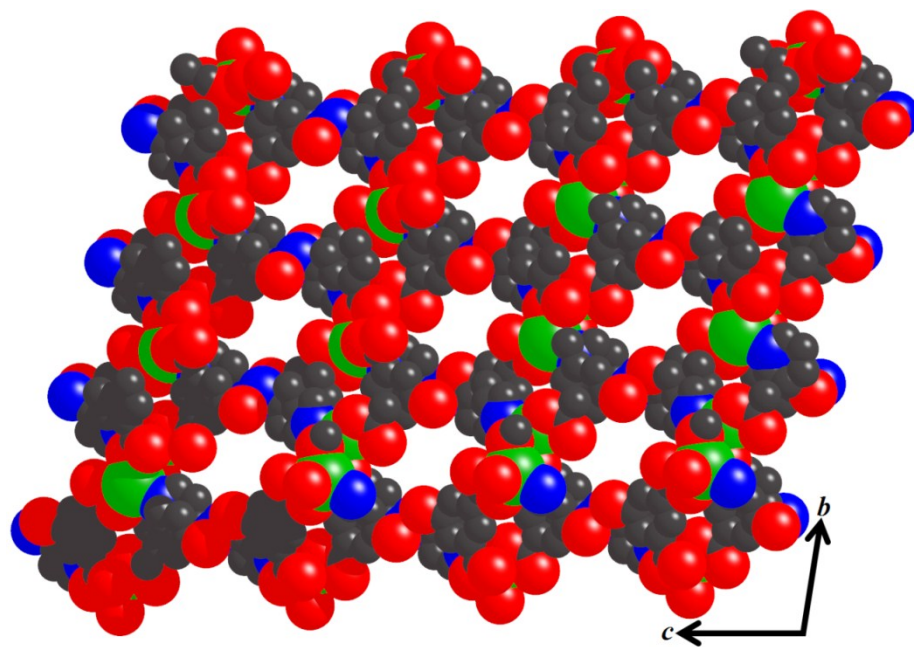

**Fig. S3** Packing diagram of **2** in space fill model (view down *a* axis). Coordinated ethanol and guest water molecules have been removed for clarity.

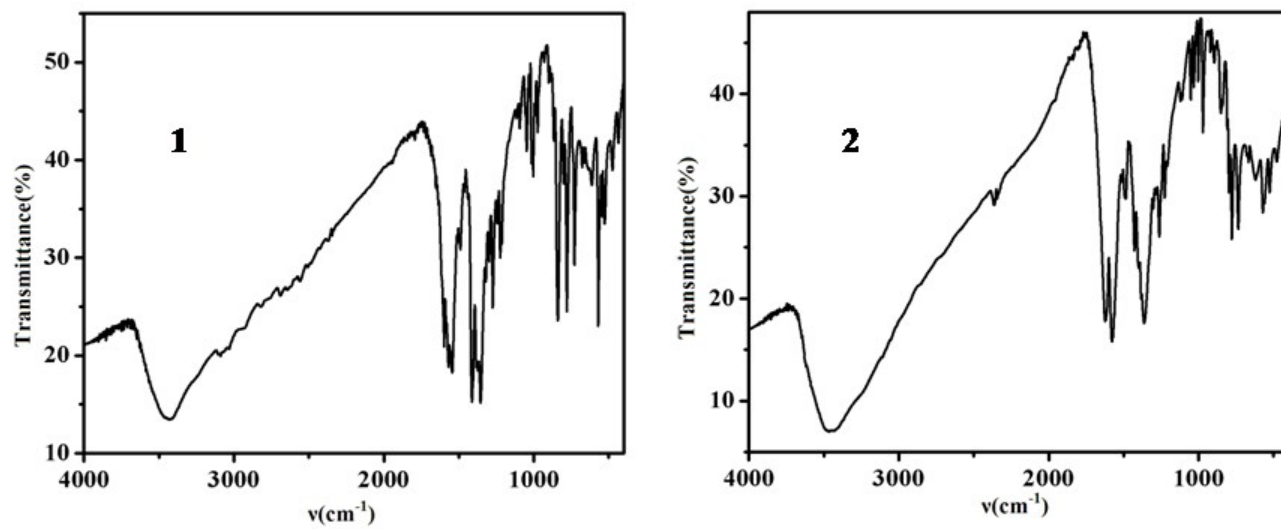

**Fig. S4** FT-IR spectra of **1** and **2**.

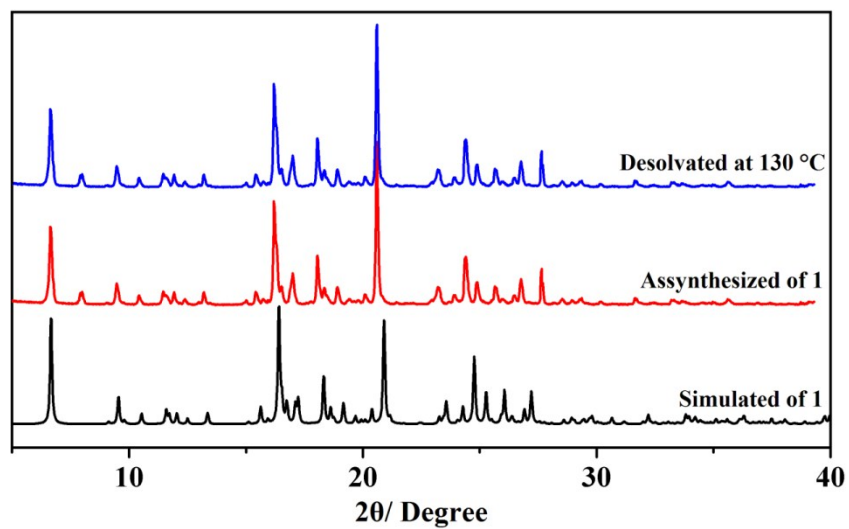

**Fig. S5** Powder X-ray diffraction patterns of compound **1** in different state.

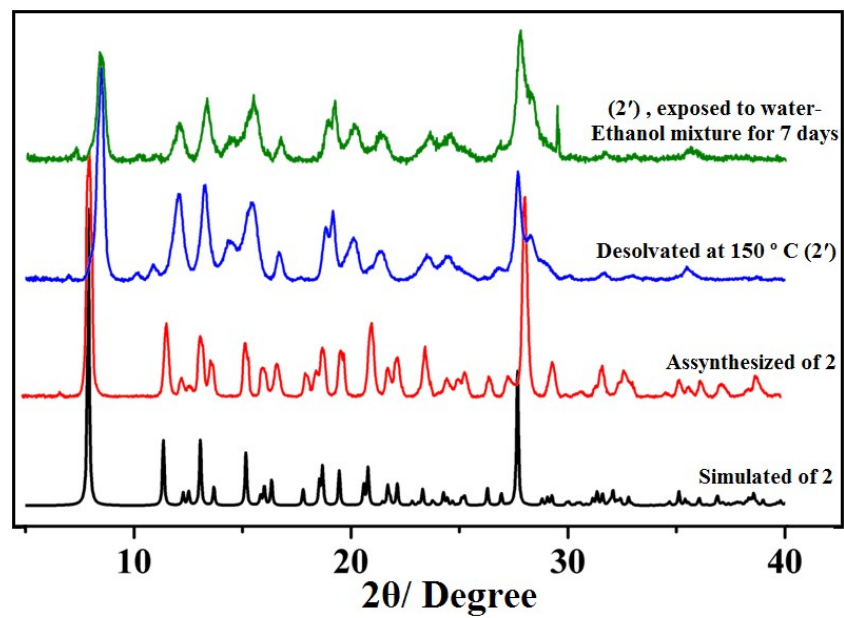

**Fig. S6** Powder X-ray diffraction patterns of compound **2** in different state.

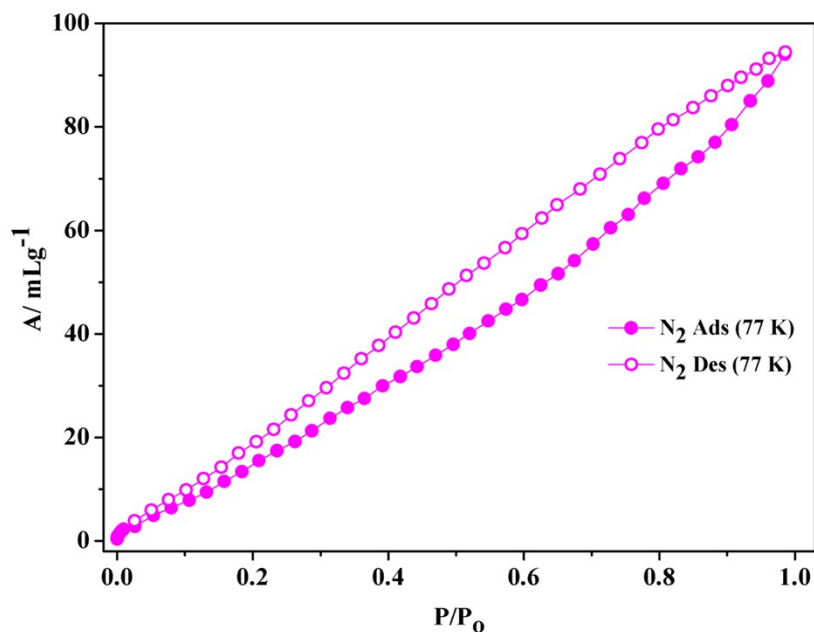

**Fig. S7**  $N_2$  adsorption isotherms of  $2'$  measured at 77 K. Filled and open circles represent adsorption and desorption respectively.

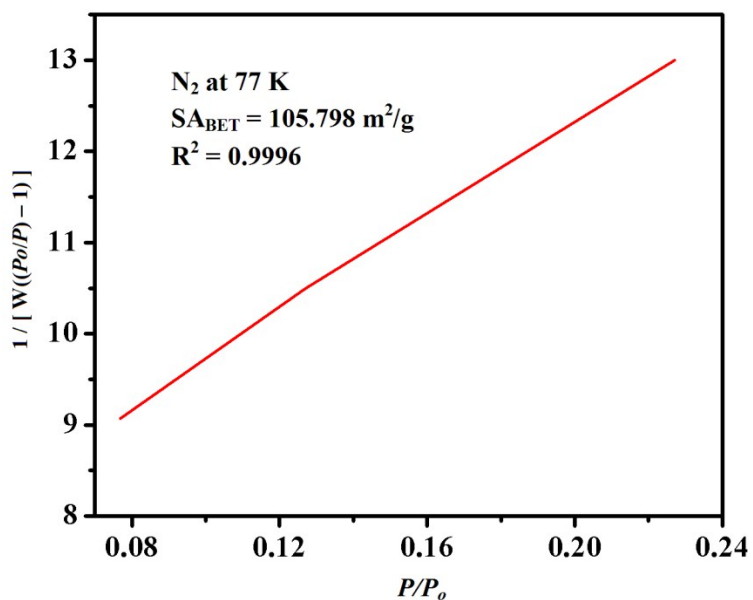

**Fig. S8** BET plots for  $2'$  calculated from the  $N_2$  adsorption isotherm at 77 K. The model was applied from  $P/P_0 = 0.08-0.24$ . The correlation factor is indicated. (W = Weight of gas absorbed at a relative pressure  $P/P_0$ ).

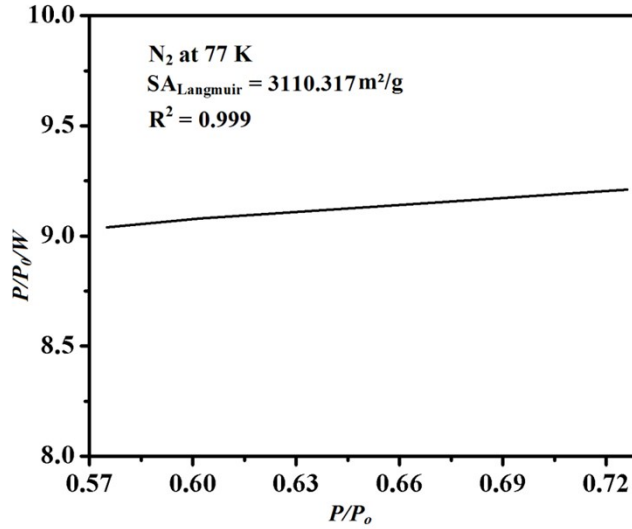

**Fig. S9** Langmuir plots for  $2'$  calculated from the  $N_2$  adsorption isotherm at 77 K. The model was applied from  $P/P_0 = 0.57$ - $0.73$ . The correlation factor is indicated. ( $W$  = Weight of gas absorbed at a relative pressure  $P/P_0$ ).

**UV-Vis spectral studies and band gap:**

The optical band gap of **1** and **2** were calculated from UV-vis absorption spectrum using Tauc's

equation:

$$\alpha = \frac{A (h\nu - E_g)^{1/2}}{h\nu}$$

Where ' $\alpha$ ' is the absorption coefficient, ' $E_g$ ' is the band gap, and ' $A$ ' is a constant. The direct band gap of **1** and **2** were obtained as 2.89 eV and 2.92 eV respectively by extrapolating the linear region near the onset in a plot of  $(\alpha h\nu)^2$  versus  $h\nu$  (Fig. S10(a) and S10(b)).

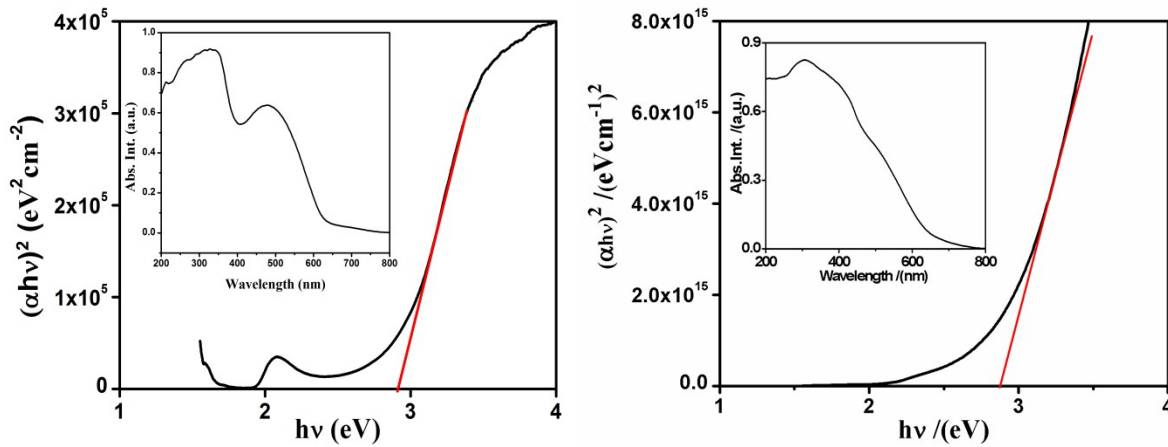



**Fig. S10 (a) and (b)** UV-vis absorption spectra and Tauc's plots of **1** and **2** respectively.

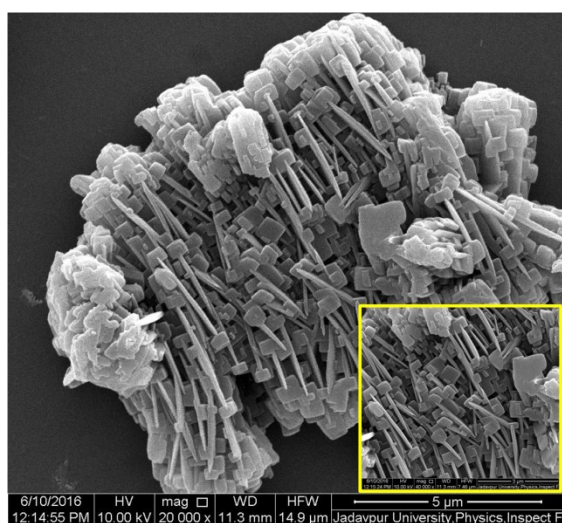

**(a)**

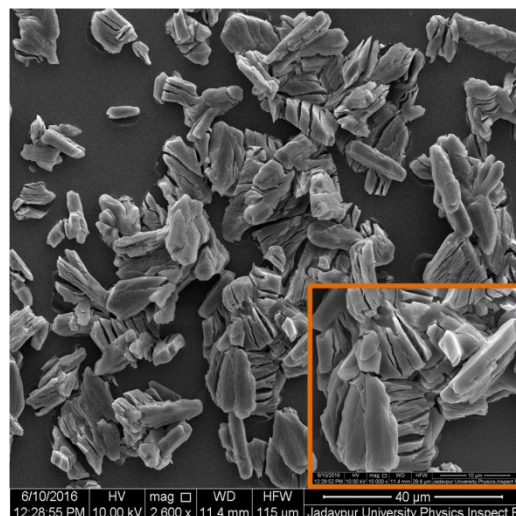

**(b)**

**Fig. S11** FESEM images along with their corresponding higher resolution images of compound (a) **1** and (b) **2** respectively.
